# Supplementary material for: A Novel Catalytically Inactive Construct of Botulinum Neurotoxin A (BoNT/A) Directly Inhibits Visceral Sensory Signalling
Source: MDPI journal article supplement (doi:10.3390/toxins16010030), 2024-01-07
Supplement: s1 [file s1]

# A novel catalytically inactive construct of botulinum neurotoxin A (BoNT/A) directly inhibits visceral sensory signaling

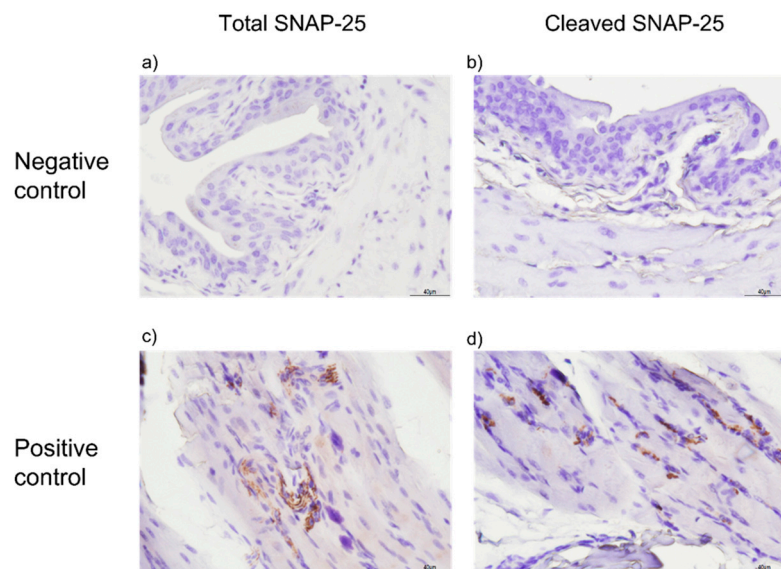

**Figure S1.** Negative and positive controls for total SNAP25 and cleaved SNAP-25 antibodies using skeletal muscle tissues sections from rats treated with aboBoNT-A.
